# Supplementary material
Source: PubMed Central journal article supplement (PMC7490755)
Supplement: NIHMS1621462-supplement-Supplement.pdf [file NIHMS1621462-supplement-Supplement.pdf]

## Supplementary material

### Acrylonitrile Butadiene Styrene (ABS) and Polycarbonate (PC) Filament

#### Three-Dimensional (3-D) Printer Emissions-Induced Cell Toxicity

Mariana T. Farcas<sup>a,b</sup>, Aleksandr B. Stefaniak<sup>c\*</sup>, Alycia K. Knepp<sup>c</sup>, Lauren Bowers<sup>c</sup>, William K. Mandler<sup>a</sup>, Michael Kashon<sup>d</sup>, Stephen R. Jackson<sup>e</sup>, Todd A. Stueckle<sup>f</sup>, Jenifer D. Sisler<sup>a</sup>, Sherri A. Friend<sup>a</sup>, Chaolong Qi<sup>g</sup>, Duane R. Hammond<sup>g</sup>, Treye A. Thomas<sup>h</sup>, Joanna Matheson<sup>h</sup>, Vincent Castranova<sup>b</sup>, Yong Qian<sup>a\*</sup>

<sup>a</sup>Pathology and Physiology Branch, Health Effects Laboratory Division, National Institute for Occupational Safety and Health, Morgantown, West Virginia

<sup>b</sup>Pharmaceutical and Pharmacological Sciences, School of Pharmacy, West Virginia University, Morgantown, West Virginia

<sup>c</sup>Field Studies Branch, Respiratory Health Division, National Institute for Occupational Safety and Health, Morgantown, West Virginia

<sup>d</sup>Biostatistics and Epidemiology Branch, Health Effects Laboratory Division, National Institute for Occupational Safety and Health, Morgantown, West Virginia

<sup>e</sup>Exposure Assessment Branch, Health Effects Laboratory Division, National Institute for Occupational Safety and Health, Morgantown, West Virginia

<sup>f</sup>Allergy and Clinical Immunology Branch, Health Effects Laboratory Division, National Institute for Occupational Safety and Health, Morgantown, West Virginia

<sup>g</sup>Engineering and Physical Hazards Branch, Division of Applied Research & Technology, National Institute for Occupational Safety and Health, Cincinnati, Ohio

<sup>h</sup>Office of Hazard Identification and Reduction, U.S. Consumer Product Safety Commission, Rockville, Maryland

**\*Corresponding Authors:** For the toxicological studies, please contact Dr. Yong Qian, Health Effects Laboratory Division, National Institute for Occupational Safety and Health, 1095 Willowdale Road, Morgantown, WV 26505 USA. Phone: (304) 285-6286. E-mail: [yaq2@cdc.gov](mailto:yaq2@cdc.gov).

For the studies of the physicochemical characterization, please contact Dr. Aleksandr B. Stefaniak, Respiratory Health Division, National Institute for Occupational Safety and Health, Morgantown, 1095 Willowdale Road, Morgantown, WV 26505 USA. Phone: (304) 285-6302. Email: [boq9@cdc.gov](mailto:boq9@cdc.gov).

Figure S1. 3-D emissions collections setup. The FFF 3-D printer emissions were collected in a stainless-steel test chamber.

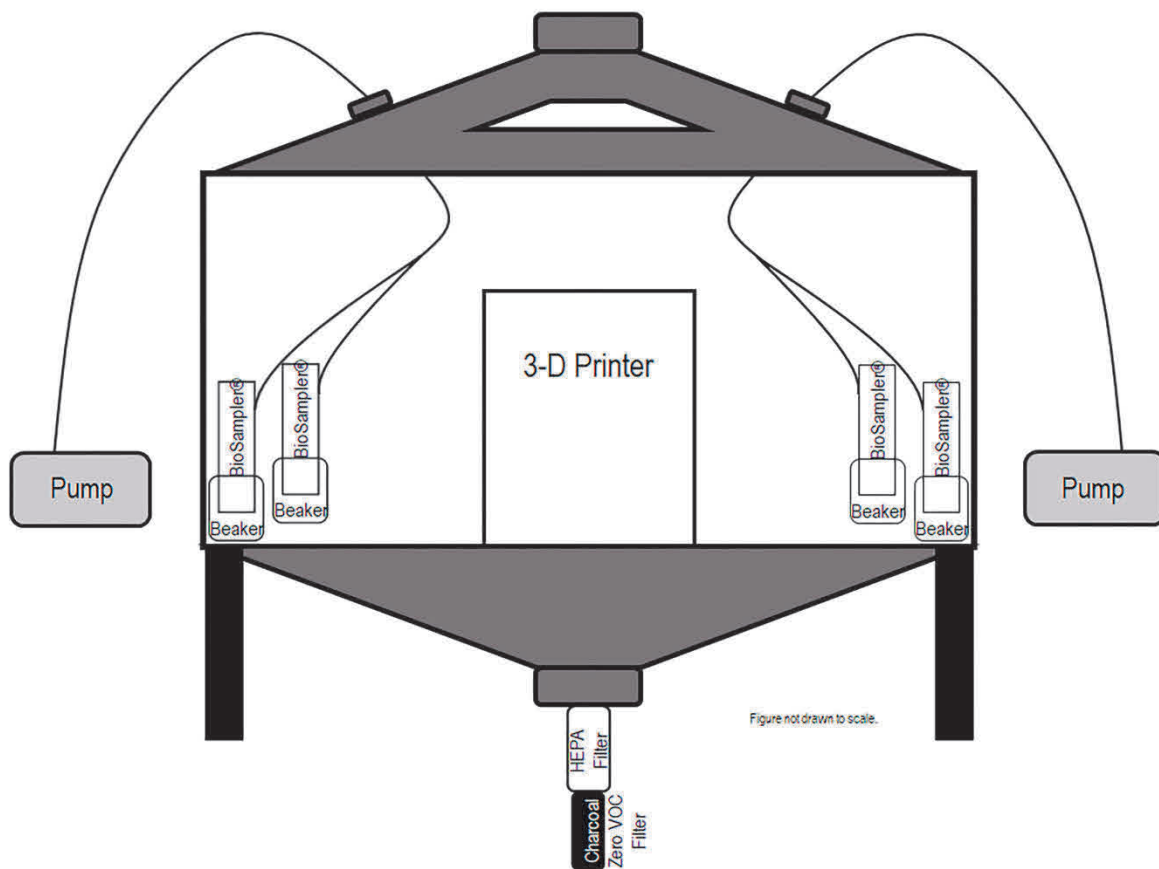

Table S1. Average particle concentrations per cm<sup>2</sup> of the background sample, PC and ABS collected emissions.

| Sample type       | Dilution | Average particles concentration (particles/ml) | Average particles/well | Average particles/cm <sup>2</sup> |
|-------------------|----------|------------------------------------------------|------------------------|-----------------------------------|
| <b>Background</b> | 0%       | 2.67E+06                                       | 2.67E+05               | 8.34E+05                          |
| <b>PC2</b>        | 0%       | 3.47E+07                                       | 3.47E+06               | 1.08E+07                          |
|                   | 25%      | 2.60E+07                                       | 2.60E+06               | 8.13E+06                          |
|                   | 50%      | 1.74E+07                                       | 1.74E+06               | 5.42E+06                          |
| <b>PC3</b>        | 0%       | 6.24E+07                                       | 6.24E+06               | 1.95E+07                          |
|                   | 25%      | 4.68E+07                                       | 4.68E+06               | 1.46E+07                          |
|                   | 50%      | 3.12E+07                                       | 3.12E+06               | 9.75E+06                          |
| <b>ABS2</b>       | 0%       | 9.08E+06                                       | 9.08E+05               | 2.84E+06                          |
|                   | 25%      | 6.81E+06                                       | 6.81E+05               | 2.13E+06                          |
|                   | 50%      | 4.54E+06                                       | 4.54E+05               | 1.42E+06                          |
| <b>ABS3</b>       | 0%       | 1.51E+07                                       | 1.51E+06               | 4.72E+06                          |
|                   | 25%      | 1.13E+07                                       | 1.13E+06               | 3.54E+06                          |
|                   | 50%      | 7.55E+06                                       | 7.55E+05               | 2.36E+06                          |

The particle concentrations were determined using nanoparticle tracking analysis (NTA) (NanoSight NS300, Malvern Instruments, Worcestershire, UK). SAEC were seeded in 96-well plates (surface area = 0.32 cm<sup>2</sup>) and exposed to 100 µL of PC or ABS particles/well collected in cell culture medium.

Calculation of estimated particles deposition fraction in the human alveoli based on the International Commission for Radiation Protection (ICRP) reference worker model for particles emitted during FFF 3-D printing with PC and ABS filament

For a print run using ABS that emits particles having geometric mean diameter of 22.7 nm (GSD = 1.3) modeling using MPPD2 (Asgharian et al., 2001) indicates that 35.8% of particles would deposit in the alveoli.

For PC, the geometric mean diameter of airborne particles released during printing is 47.5 nm (GSD = 1.3) and modeling indicates that 23.8% would deposit in the alveoli. Both particle sizes are means from n = 5 runs per filament from a prior study (Stefaniak et al., 2018).

Using default values for the International Commission for Radiation Protection (ICRP) reference worker model (20 breaths per minute, 1000 mL tidal volume, 3300 mL FRC volume) as a nose-mouth breather (ICRP. International Commission on Radiological Protection. Publication 66: Human respiratory tract model for radiological protection vol. 24. Pergamon: Oxford, UK, 1994):

### ABS

8 hours work day = 480 min,

20 breaths /min,

1000 ml tidal volume,

- $480 \times 20 \times 1,000 = 9.6 \times 10^6$  total mL breath per work day

Assuming that the average particles concentration in the chamber =  $2.5 \times 10^5$  particles/  $\text{cm}^3$  (reasonable based on our previous work (Yi et al., 2016), the total # of inhaled particles would be

- $5 \times 10^4 \times 9.6 \times 10^6 = 4.8 \times 10^{11}$  particles inhaled

Next, to get the # particles/  $\text{cm}^2$  of alveoli

- $(\text{total \# inhaled particles}) \times (\text{fraction deposited in alveoli region}) / (\text{total surface area of the lung}) = (4.8 \times 10^{11}) \times 0.358 / (102 \times 10^4) = 1.7 \times 10^5$  particles/  $\text{cm}^2$

### PC

Same as above but using 0.238 as alveolar deposition fraction =  $1.1 \times 10^5$  particles/  $\text{cm}^2$

These calculated values are in good agreement with the in vitro dose values given in Table S2.

Table S2. Characterization of particles generated during a total of seven print runs (one background, three of PC, and three of ABS): concentration of undiluted collected samples and mean hydrodynamic diameter, mode diameter, and size of the particles in the 50<sup>th</sup> percentile were measured using NTA, and zeta potential was determined using ELS.

| Sample                                                                                               | Concentration<br>(particles/mL)          | Mean<br>Diameter<br>(nm) | Mode<br>Diameter<br>(nm) | D50<br>(nm)      | Zeta Potential<br>(mV)        |
|------------------------------------------------------------------------------------------------------|------------------------------------------|--------------------------|--------------------------|------------------|-------------------------------|
| Background <sup>a</sup>                                                                              | $0.267 \times 10^7 \pm 4.06 \times 10^5$ | $209.8 \pm 13.1$         | $183.9 \pm 28.1$         | $172.4 \pm 12.6$ | $-19.7 \pm 0.7$<br>(pH = 8.0) |
| PC1                                                                                                  | $3.43 \times 10^7 \pm 1.17 \times 10^6$  | $232.6 \pm 12.9$         | $163.3 \pm 13.0$         | $201.6 \pm 13.9$ | $-15.7 \pm 2.5$<br>(pH = 7.9) |
| PC2                                                                                                  | $3.47 \times 10^7 \pm 3.47 \times 10^6$  | $201.0 \pm 8.0$          | $151.5 \pm 8.7$          | $166.8 \pm 7.3$  | $-19.1 \pm 0.8$<br>(pH = 7.9) |
| PC3                                                                                                  | $6.24 \times 10^7 \pm 3.66 \times 10^6$  | $169.5 \pm 8.0$          | $139.5 \pm 4.2$          | $147.2 \pm 3.1$  | $-19.4 \pm 0.3$<br>(pH = 7.9) |
| ABS1                                                                                                 | $2.53 \times 10^7 \pm 1.22 \times 10^6$  | $217.3 \pm 1.1$          | $171.1 \pm 15.9$         | $196.0 \pm 6.5$  | $-21.3 \pm 1.8$<br>(pH = 7.8) |
| ABS2                                                                                                 | $0.908 \times 10^7 \pm 1.39 \times 10^6$ | $192.5 \pm 9.1$          | $176.3 \pm 34.7$         | $173.6 \pm 14.3$ | $-17.6 \pm 0.6$<br>(pH = 8.0) |
| ABS3                                                                                                 | $1.51 \times 10^7 \pm 1.47 \times 10^6$  | $197.5 \pm 9.6$          | $157.8 \pm 27.3$         | $170.0 \pm 20.1$ | $-18.0 \pm 0.7$<br>(pH = 8.0) |
| <sup>a</sup> “Background” refers to chamber air while the printer was powered off and not operating. |                                          |                          |                          |                  |                               |

Table S3. Volatile organic compounds (VOCs) emitted during a total of seven print runs (one background, three of PC, and three of ABS) identified by GC-MS.

| Sample | Retention Time (min) | Peak Area                                 | Compound Name                            | Compound Structure                                                                    | % Match |
|--------|----------------------|-------------------------------------------|------------------------------------------|---------------------------------------------------------------------------------------|---------|
| PC1    | 9.833                | $3.04 \times 10^8 \pm 1.11 \times 10^7$   | Phenol                                   | 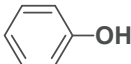   | 94%     |
| PC2    |                      | $4.65 \times 10^8 \pm 8.94 \times 10^7$   |                                          |                                                                                       |         |
| PC3    |                      | $6.35 \times 10^8 \pm 6.41 \times 10^7$   |                                          |                                                                                       |         |
| PC1    | 15.942               | ND                                        | p-Isopropenylphenol                      | 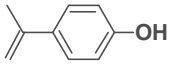   | 94%     |
| PC2    |                      | $5.04 \times 10^8 \pm 7.57 \times 10^7$   |                                          |                                                                                       |         |
| PC3    |                      | $3.52 \times 10^8 \pm 3.13 \times 10^8$   |                                          |                                                                                       |         |
| PC1    | 21.533               | $0.568 \times 10^8 \pm 0.155 \times 10^8$ | Bisphenol A                              | 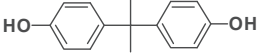   | 93%     |
| PC2    |                      | $22.00 \times 10^8 \pm 1.42 \times 10^8$  |                                          |                                                                                       |         |
| PC3    |                      | $13.50 \times 10^8 \pm 2.01 \times 10^8$  |                                          |                                                                                       |         |
| ABS1   | 12.182               | $0.302 \times 10^8 \pm 0.110 \times 10^8$ | Acetophenone                             | 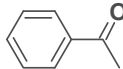   | 96%     |
| ABS2   |                      | $0.61 \times 10^8 \pm 6.42 \times 10^6$   |                                          |                                                                                       |         |
| ABS3   |                      | $0.57 \times 10^8 \pm 1.03 \times 10^7$   |                                          |                                                                                       |         |
| ABS1   | 12.797               | $0.602 \times 10^8 \pm 0.717 \times 10^7$ | $\alpha,\alpha$ -Dimethylbenzenemethanol | 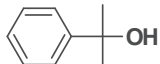 | 94%     |
| ABS2   |                      | $0.71 \times 10^8 \pm 6.30 \times 10^6$   |                                          |                                                                                       |         |
| ABS3   |                      | $0.87 \times 10^8 \pm 2.57 \times 10^7$   |                                          |                                                                                       |         |
| ABS1   | 17.103               | $0.581 \times 10^8 \pm 1.88 \times 10^7$  | Styrene                                  | 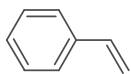 | 72%     |
| ABS2   |                      | $0.85 \times 10^8 \pm 6.45 \times 10^6$   |                                          |                                                                                       |         |
| ABS3   |                      | $1.10 \times 10^8 \pm 2.90 \times 10^7$   |                                          |                                                                                       |         |
| ABS1   | 17.343               | $0.652 \times 10^8 \pm 0.595 \times 10^7$ | 3-Cyclohexen-1-ylbenzene                 | 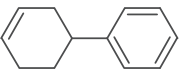 | 78%     |
| ABS2   |                      | $0.45 \times 10^8 \pm 3.70 \times 10^7$   |                                          |                                                                                       |         |
| ABS3   |                      | $0.93 \times 10^8 \pm 2.51 \times 10^7$   |                                          |                                                                                       |         |

ND = not determined

Compounds were tentatively identified by comparing mass spectra to the 2014 NIST/EPA/NIH Mass Spectral Library (NIST 14); only compounds that matched  $\geq 70\%$  with the Library are reported herein.

Figure S2. Representative chromatograms of the organic compounds emitted during a total of seven print runs (one background, three of PC, and three of ABS). 3-D printer emissions were collected in cell culture medium and organic compounds were analyzed by SPME/GC-MS, followed by tentative identification by comparing mass spectra to the 2014 NIST/EPA/NIH Mass Spectral Library (NIST 14). As we did not quantify the levels of the chemicals, these data should be considered for information only.

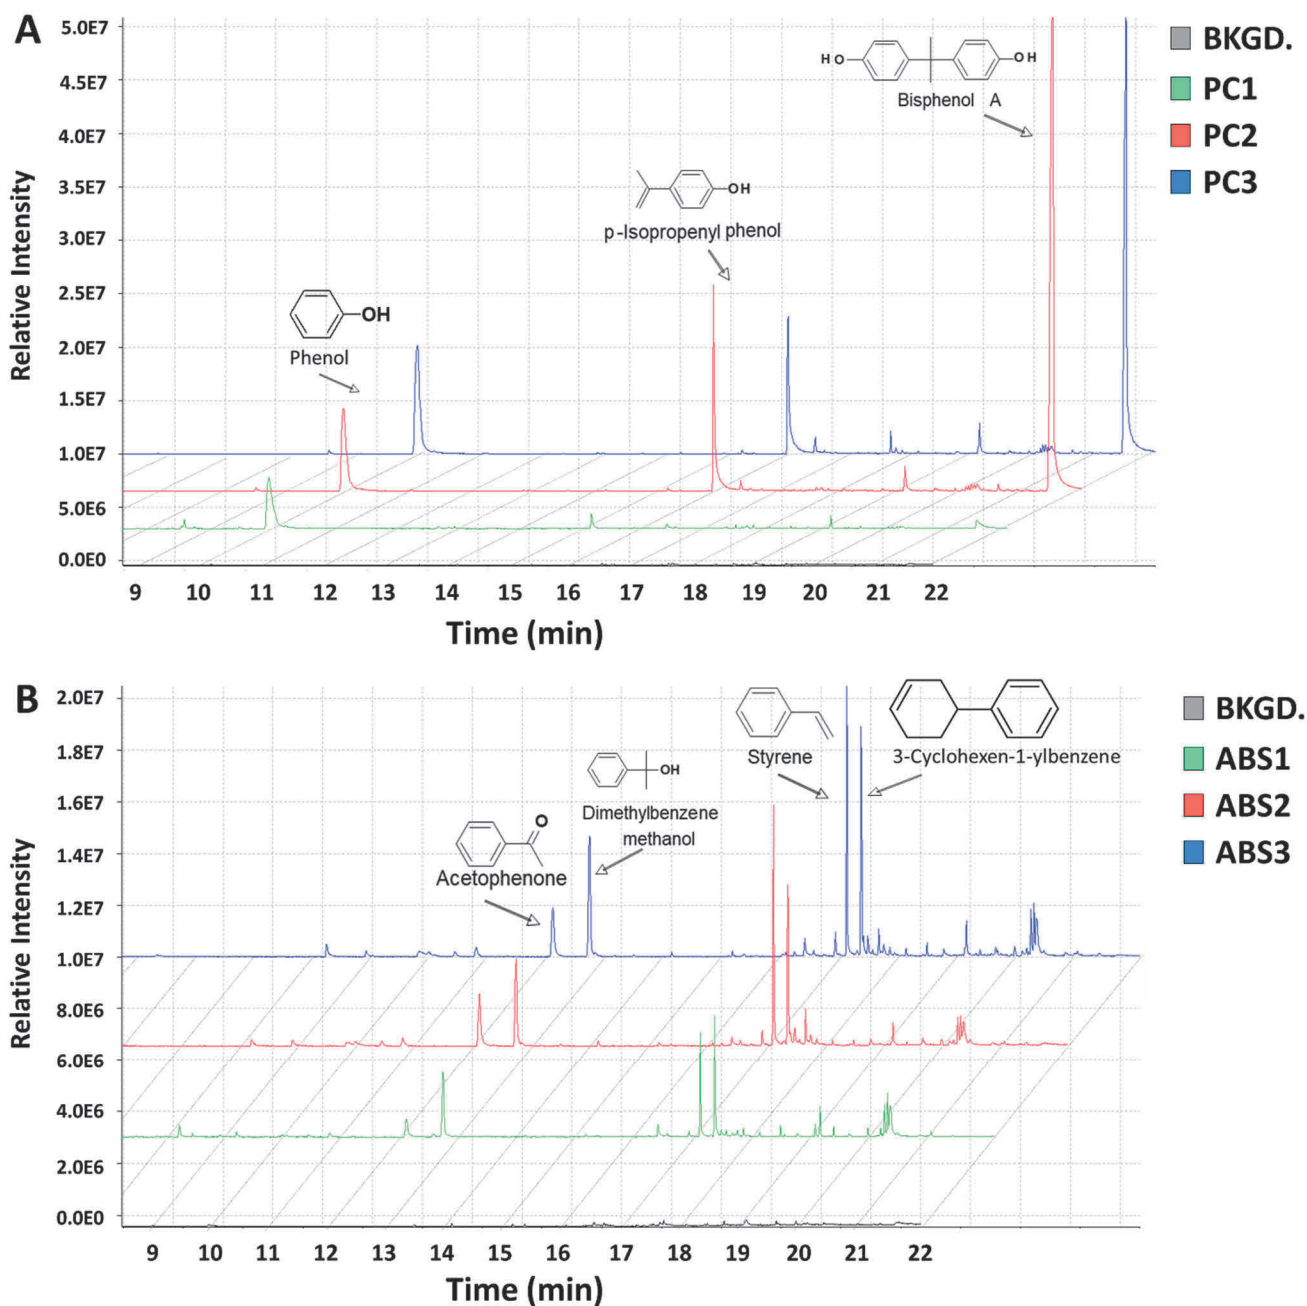

Figure S3. Cytotoxicity of the FFF 3-D printer emissions: cell viability and LDH activity of SAEC exposed to PC (A) and ABS (B) emissions. The PC (prints 2 and 3) and ABS (prints 2 and 3) collected emissions were subjected to vigorous vortex mixing for 5 min, and exposed as 50% dilution, and 25% dilution in serum-free SABM™, and undiluted (0%), resulting in six doses for each filament type (Supplemental Table S1). The background sample was used undiluted. The control samples were treated with SABM™.

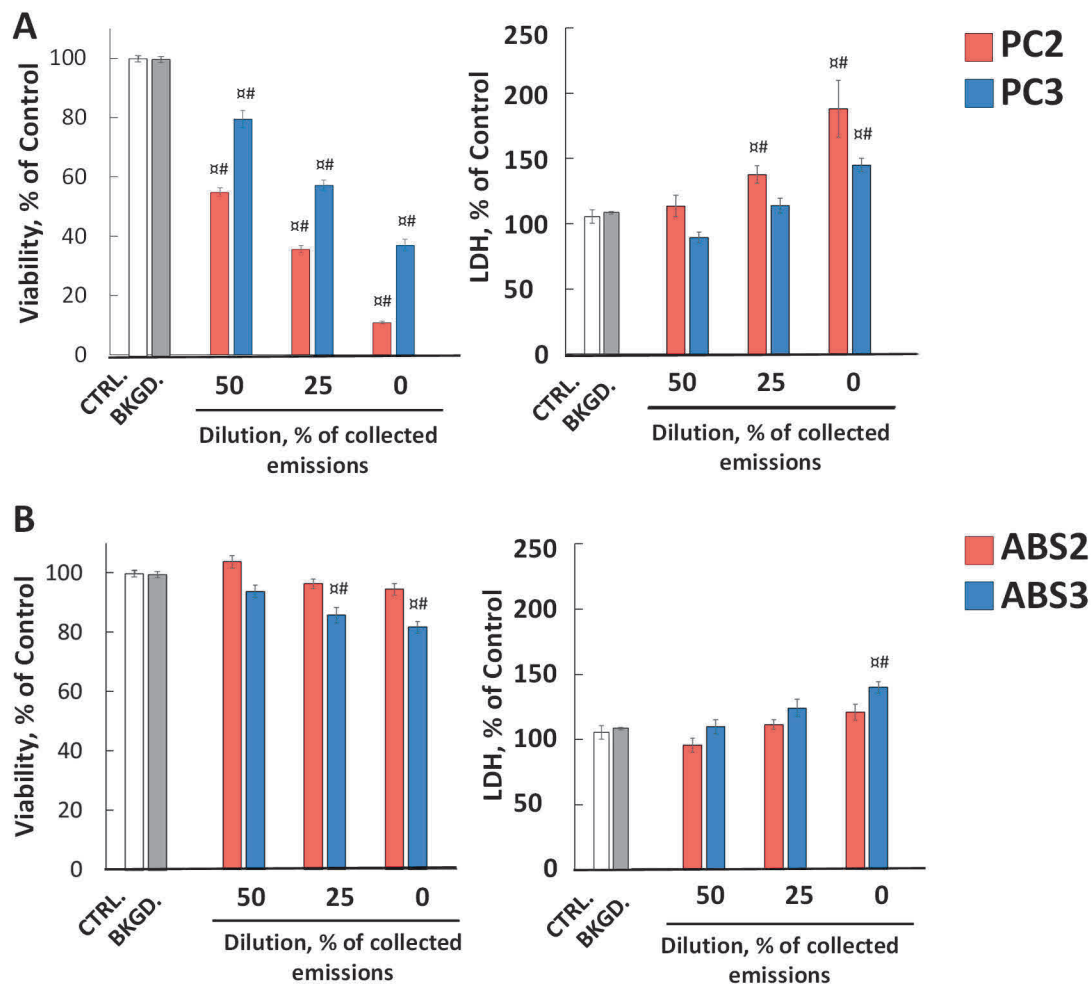

Following one-way analyses of variance, where the assumptions of the model were examined, Dunnett's Test was used to determine significance of each treatment compared to either control non-treated cells or background ( $p < 0.05$ ). The symbol ( $\boxtimes$ ) indicate statistically significant differences compared to serum-free cell culture medium treated control ( $p < 0.05$ ). The number (#) signs indicate statistically significant differences compared to the background (ambient air) treated groups ( $p < 0.05$ ).

Table S4. Cytokine and chemokine production in SAECs exposed to FFF 3-D printer emissions. SAEC were exposed the PC and ABS emissions in culture medium for 24 h. The PC (print 2 and 3) and ABS (print 2 and 3) collected emissions were subjected to vigorous vortex mixing for 5 min, and exposed as 50% dilution, and 25% dilution in serum-free SABM™, and undiluted (0%), resulting in six doses for each filament type (Supplemental Table S1). The background sample was used undiluted. The control samples were treated with SABM™. Experiments were performed in three independent experiments with n = 3 replicates each.

| Agent   | Dilution, % | Average particles/cm <sup>2</sup> | Analyte,<br>pg/total cells (x 10 <sup>-4</sup> ) ± SEM |                 |                     |                   |                   |                      |                   |                 |
|---------|-------------|-----------------------------------|--------------------------------------------------------|-----------------|---------------------|-------------------|-------------------|----------------------|-------------------|-----------------|
|         |             |                                   | IL-12p70                                               | IL-1α           | IL-13               | IL-1β             | IL-6              | IL-8                 | IL-16             | TNF-α           |
| Control | NA          | 0                                 | 1.427 ± 0.48                                           | 1.287 ± 0.01    | 696.209 ± 24.68     | 0.791 ± 0.04      | 145.978 ± 2.77    | 4265.423 ± 132.75    | 21.603 ± 4.69     | 2.281 ± 0.12    |
| BKGD.   | 0           | 0.834E+06                         | 1.935 ± 0.21                                           | 1.902 ± 0.24    | 887.601 ± 88.93     | 0.954 ± 0.07      | 129.15 ± 34.98    | 5318.803 ± 159.51    | 32.795 ± 3.62     | 2.087 ± 0.07    |
| PC2     | 50          | 5.42E+06                          | 2.704 ± 0.07                                           | 4.310 ± 0.47    | 1431.56 ± 72.08*#   | 1.572 ± 0.06      | 927.116 ± 37*#    | 11082.741 ± 184.21*# | 65.197 ± 8.11     | 4.112 ± 0.04    |
|         | 25          | 8.13E+06                          | 3.980 ± 0.59*#                                         | 8.117 ± 0.3*#   | 2418.064 ± 244.37*# | 2.761 ± 0.15      | 784.944 ± 23.43*# | 20559.863 ± 272.47*# | 110.102 ± 11.65*# | 5.912 ± 0.37*#  |
|         | 0           | 10.8E+06                          | 13.171 ± 0.98*#                                        | 62.670 ± 3.15*# | 6278.268 ± 249.32*# | 370.918 ± 48.43*# | 976.032 ± 17.63*# | 32377.009 ± 842.63*# | 371.096 ± 47.47*# | 17.907 ± 1.56*# |
| PC3     | 50          | 9.75E+06                          | 1.445 ± 0.47                                           | 1.260 ± 0.07    | 786.841 ± 113.71    | 1.105 ± 0.03      | 255.645 ± 15.79*# | 3388.327 ± 515.7     | 27.951 ± 13.79    | 1.967 ± 0.23    |
|         | 25          | 14.6E+06                          | 2.550 ± 0.44                                           | 2.098 ± 0.36    | 1281.809 ± 47.44*#  | 1.424 ± 0.26      | 367.843 ± 6.19*#  | 8654.719 ± 224.36*#  | 48.326 ± 6.42     | 3.875 ± 0.23    |
|         | 0           | 19.5E+06                          | 3.039 ± 0.22*#                                         | 3.261 ± 0.12    | 1736.912 ± 94.12*#  | 2.352 ± 0.08      | 259.588 ± 3.81*#  | 9050.036 ± 40.02*#   | 106.033 ± 12.12*# | 6.154 ± 0.18*#  |
| ABS2    | 50          | 1.42E+06                          | 1.263 ± 0.24                                           | 0.848 ± 0.01    | 778.315 ± 58.09     | 0.985 ± 0.03      | 186.598 ± 7.16    | 6529.206 ± 56.22*#   | 40.247 ± 5.58     | 2.288 ± 0.29    |
|         | 25          | 2.13E+06                          | 1.377 ± 0.16                                           | 1.004 ± 0.06    | 610.418 ± 48.05     | 0.763 ± 0.07      | 193.677 ± 1.59    | 4720.557 ± 104.95    | 31.410 ± 1.03     | 1.793 ± 0.11    |
|         | 0           | 2.84E+06                          | 1.135 ± 0.07                                           | 1.126 ± 0.09    | 674.216 ± 27.35     | 0.751 ± 0.02      | 234.538 ± 8.1*#   | 5424.276 ± 73.44     | 30.753 ± 2.41     | 1.868 ± 0.03    |
| ABS3    | 50          | 2.36E+06                          | 1.886 ± 0.34                                           | 1.483 ± 0.24    | 603.601 ± 26.87     | 0.928 ± 0.04      | 131.905 ± 6.15    | 3925.374 ± 63.63     | 29.871 ± 0.22     | 1.989 ± 0.11    |
|         | 25          | 3.54E+06                          | 1.642 ± 0.35                                           | 1.275 ± 0.01    | 672.43 ± 34.94      | 1.329 ± 0.1       | 135.475 ± 1.18    | 2468.865 ± 40.22*#   | 38.818 ± 0.02     | 1.842 ± 0.18    |
|         | 0           | 4.72E+06                          | 3.228 ± 0.68                                           | 2.490 ± 0.32    | 1133.304 ± 260.87   | 1.386 ± 0.01      | 208.989 ± 5.67*#  | 5039.533 ± 99.95     | 67.015 ± 2.54*#   | 2.414 ± 0.31    |

Following one-way analyses of variance, where the assumptions of the model were examined, Dunnett's Test was used to determine significance of each treatment compared to either control or background (p<0.05). The symbol (⊠) indicate statistically significant differences compared to serum-free cell culture medium treated control (p < 0.05). The number (#) signs indicate statistically significant differences compared to the background (ambient air) treated groups (p < 0.05).

## References

- Asgharian, B., Hofmann, W., Bergmann, R., 2001. Particle Deposition in a Multiple-Path Model of the Human Lung. *Aerosol Science and Technology* 34, 332-339.
- Stefaniak, A.B., Bowers, L.N., Knepp, A.K., Virji, M.A., Birch, E.M., Ham, J.E., Wells, J.R., Qi, C., Schwegler-Berry, D., Friend, S., Johnson, A.R., Martin, S.B., Jr., Qian, Y., LeBouf, R.F., Birch, Q., Hammond, D., 2018. Three-dimensional printing with nano-enabled filaments releases polymer particles containing carbon nanotubes into air. *Indoor Air* 28, 840-851.
- Yi, J., LeBouf, R.F., Duling, M.G., Nurkiewicz, T., Chen, B.T., Schwegler-Berry, D., Virji, M.A., Stefaniak, A.B., 2016. Emission of particulate matter from a desktop three-dimensional (3D) printer. *J Toxicol Environ Health A* 79, 453-465.
